# Supplementary material
Source: PubMed Central journal article supplement (PMC8721571)

### Supplemental Figure 1A-1B

**Suppl. Fig. 1.** Monochrome immunofluorescence images of a human SVZ containing NSCs and GSCs (**A**) and a peri-arteriolar GSC niche in a human glioblastoma tumor (**B**). CD133 is stained in green (**Aa** and **Ba**), DAPI staining of cell nuclei in blue (**Ab** and **Bb**), and CD9 is stained in red (**Ac** and **Bc**). The composition images which were the basis for the construction of the pseudocolor images in Figure 1 are shown in **Ad** and **Bd**. Bars, 100  $\mu\text{m}$ .

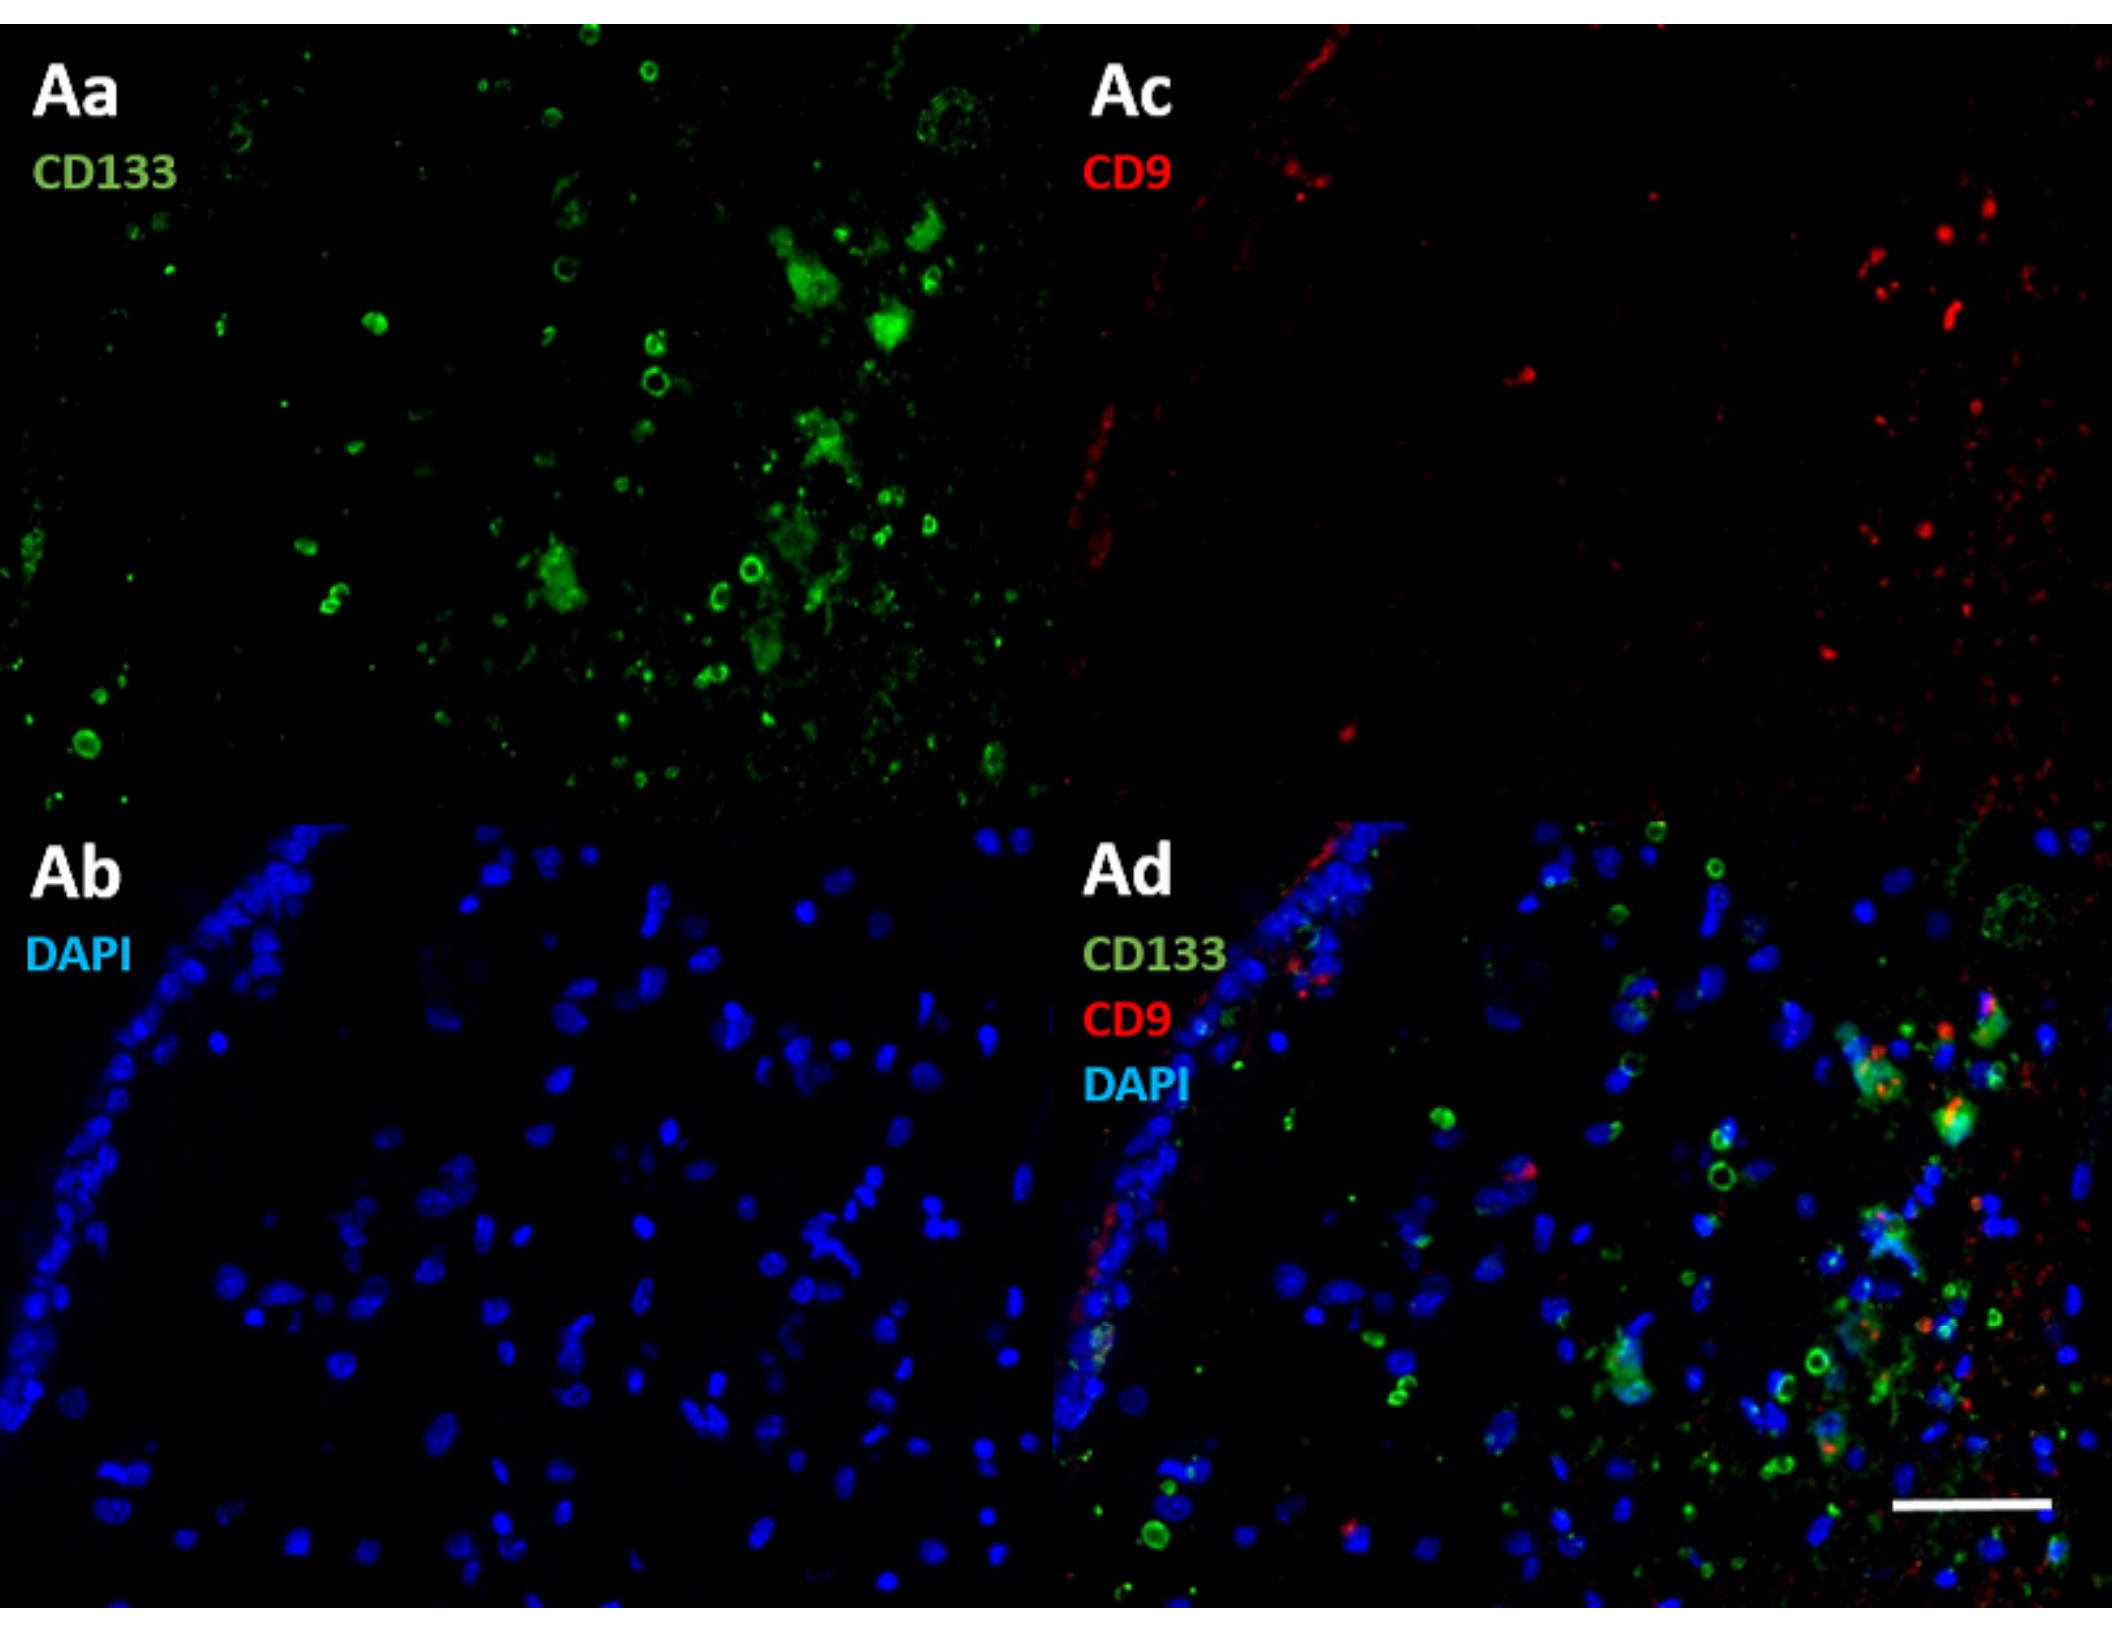

**Aa**  
CD133

**Ac**  
CD9

**Ab**  
DAPI

**Ad**  
CD133  
CD9  
DAPI

**Ba**

CD133

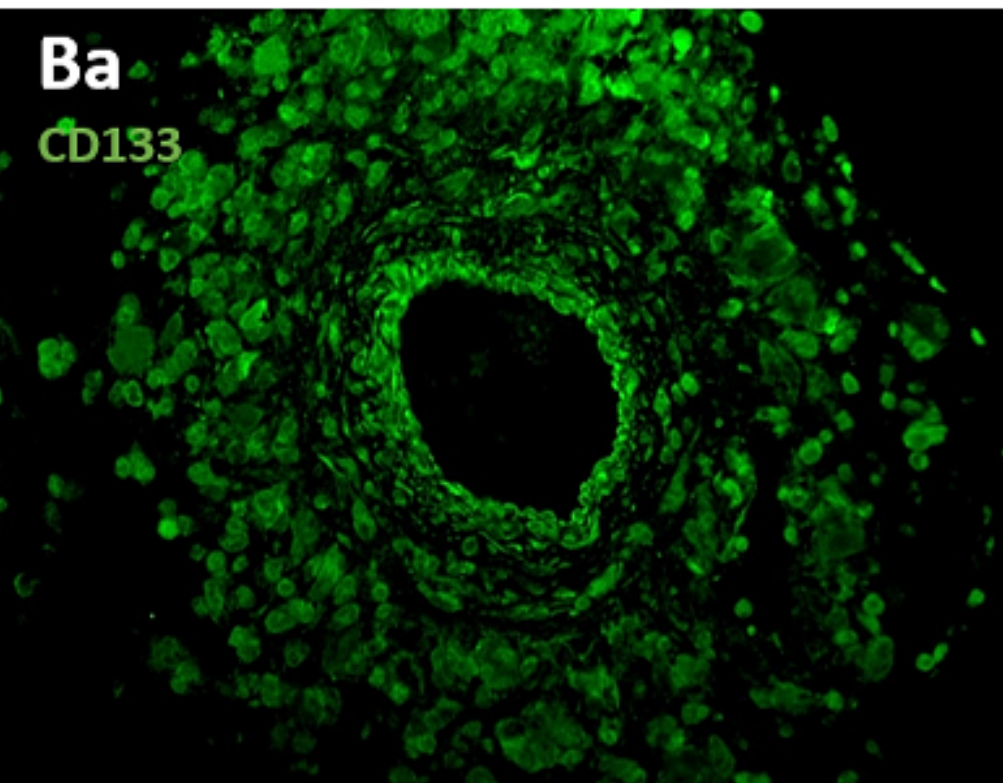

**Bc**

SMA

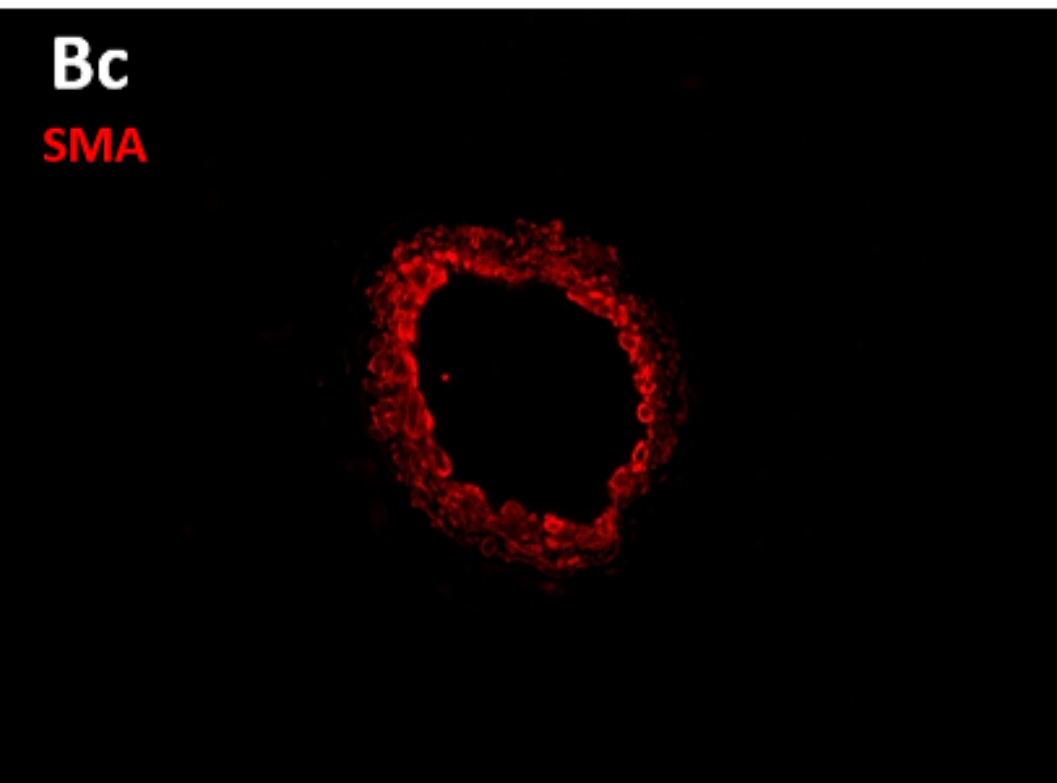

**Bb**

DAPI

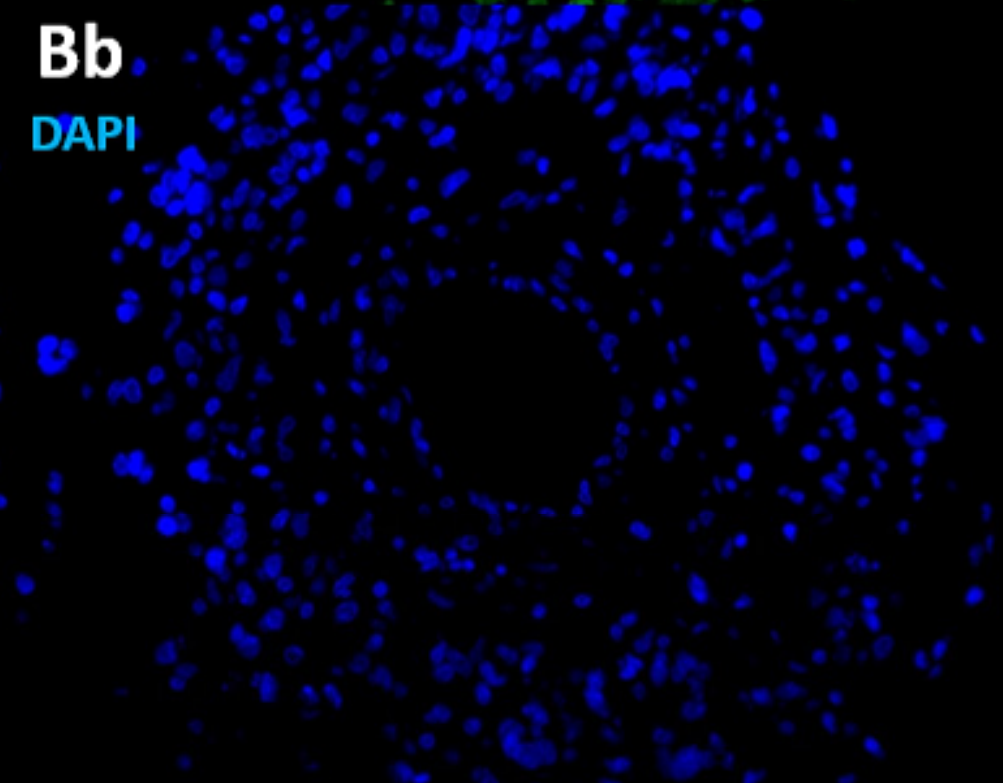

**Bd**

CD133  
SMA  
DAPI

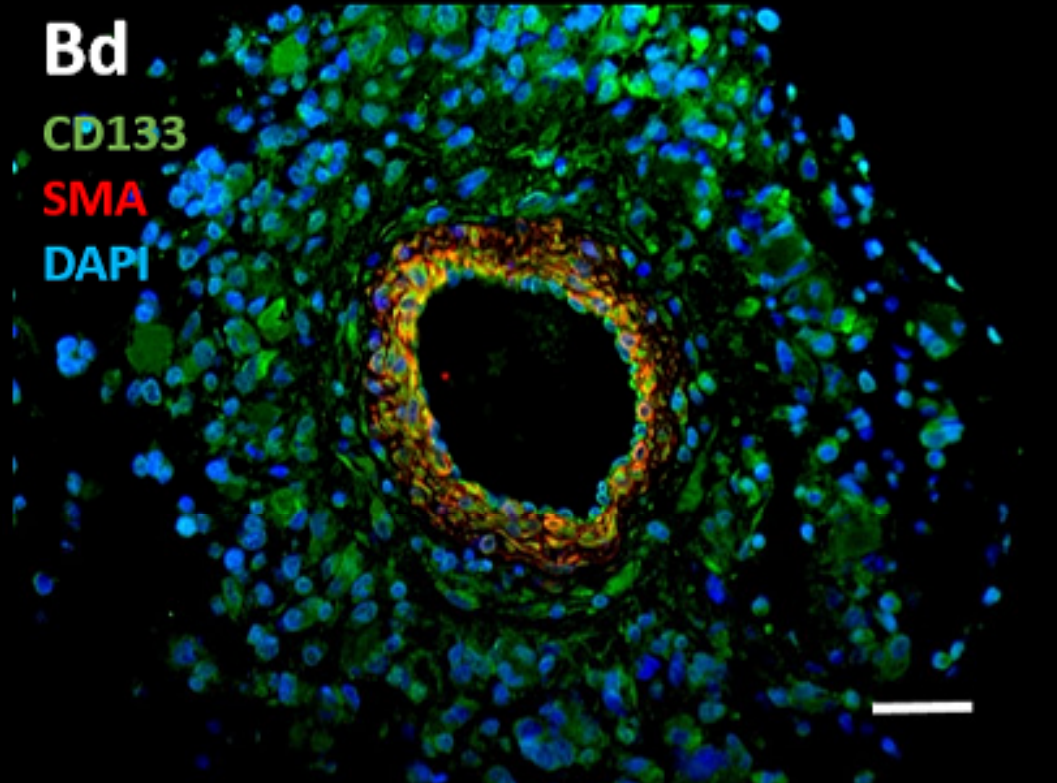

Supplement: sj-pdf-1-jhc-10.1369_00221554211054585.pdf [file sj-pdf-1-jhc-10.1369_00221554211054585.pdf]
